# Supplementary material for: A safe propylene carbonate/water hybrid electrolyte for supercapacitors
Source: Royal Society of Chemistry journal article supplement (doi:10.1039/c9nj04541d), 2019-12-03
Supplement: c9nj04541d1.pdf [file c9nj04541d1.pdf]

## Supplementary Information for

# **Safe propylene carbonate/water hybrid electrolyte for supercapacitor**

Chenhao Dong,<sup>a</sup> Wei Kang,<sup>a</sup> Cuihua An<sup>a,b\*</sup>

a Tianjin Key Laboratory of Advanced Functional Porous Materials, Institute for New Energy Material & Low-Carbon Technologies, School of Materials Science and Engineering, Tianjin University of Technology, Tianjin 300384, P.R. China

b Key Laboratory of Advanced Energy Materials Chemistry (MOE), College of Chemistry, Nankai University, Tianjin 300071, P.R. China

\*E-mail: [ancuihua@tjut.edu.cn](mailto:ancuihua@tjut.edu.cn)

Table S1 Mass ratio of each component of different concentrations of electrolyte

|                                  | 3 M  | 5 M  | 7 M  | 10 M | 14 M |
|----------------------------------|------|------|------|------|------|
| LiTFSI (g)                       | 6.03 | 6.03 | 6.03 | 6.03 | 6.03 |
| H <sub>2</sub> O (g)             | 1    | 1    | 1    | 1    | 1    |
| PC (g)                           | 6    | 3.2  | 2    | 1.1  | 0.5  |
| mass ratio (PC/H <sub>2</sub> O) | 6    | 3.2  | 2    | 1.1  | 0.5  |

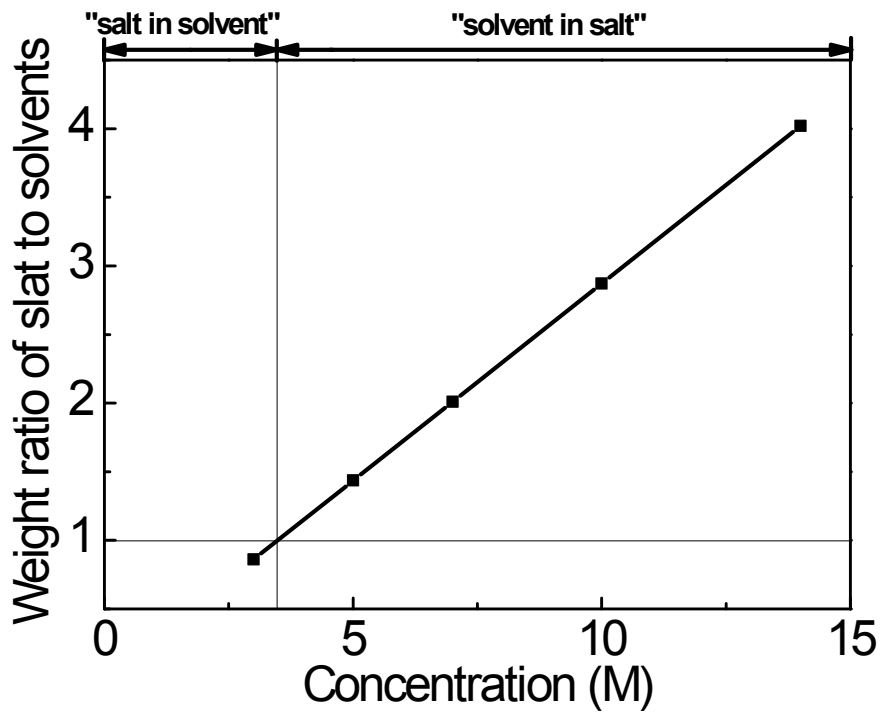

Fig. S1 The weight ratio of salt (LiTFSI) to solvents (Propylene carbonate/Water) as a function of the concentrations for various electrolytes.

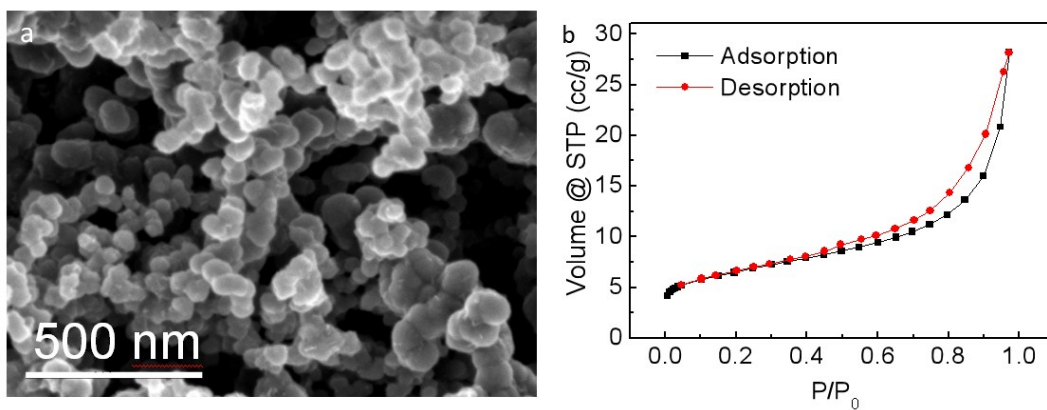

Fig. S2 Characterization of acetylene black. (a) SEM image and (b) Nitrogen adsorption-desorption isotherm.

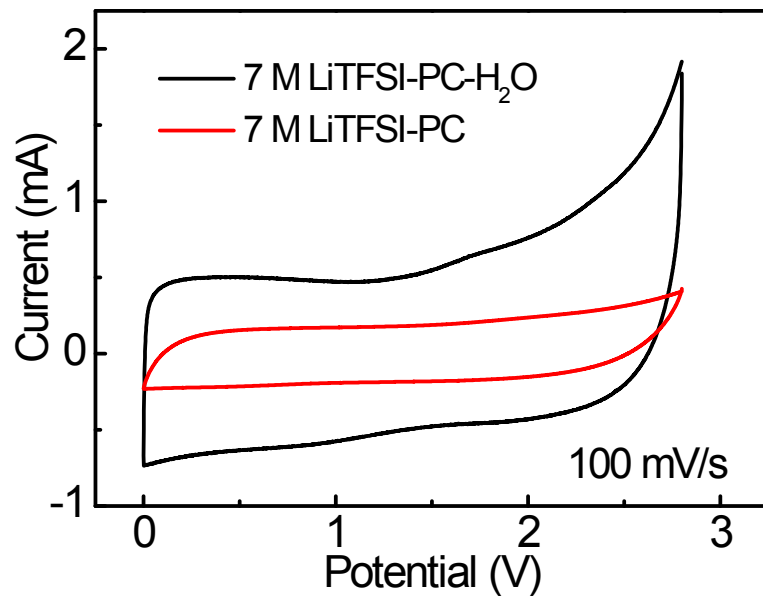

Fig. S3 Comparison of the CV curves of the SC using 7 M LiTFSI-PC/H<sub>2</sub>O electrolyte and the supercapacitor using 7 M LiTFSI-PC electrolyte at an operation voltage of 2.8 V .

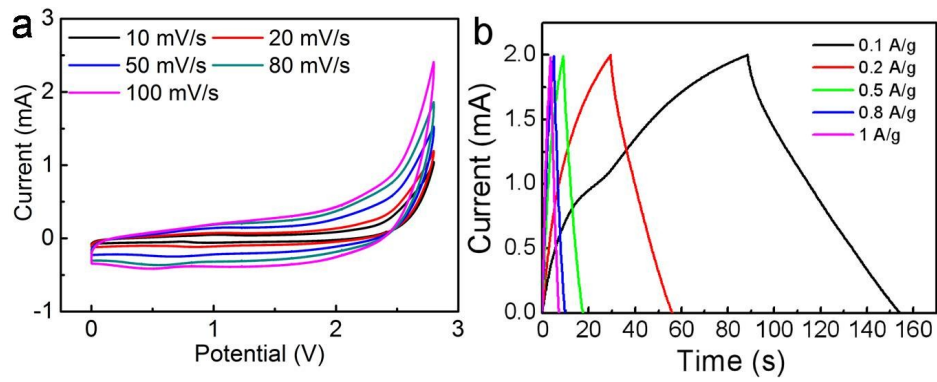

Fig. S4 The electrochemical performances of the AB electrode in 21 M LiTFSI-H<sub>2</sub>O electrolyte. (a) CV curves at different sweep speeds and (b) GCD curves at different current densities.

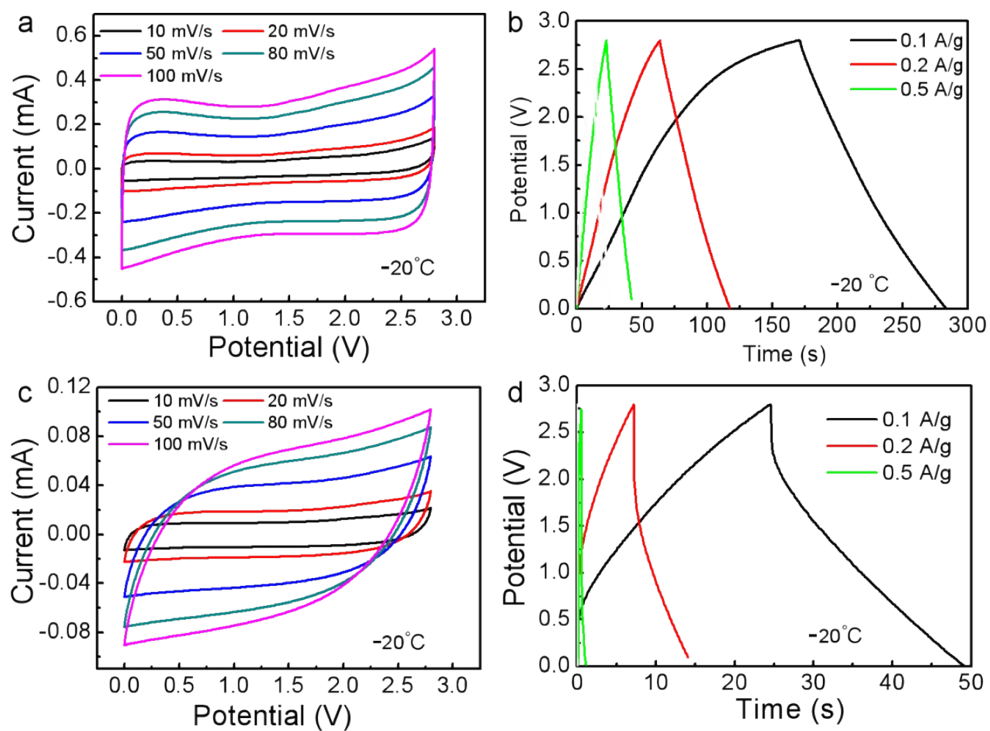

Fig. S5 The AB electrode in the 7 M LiTFSI-PC/H<sub>2</sub>O electrolyte at -20 °C. (a) CV curves at different sweep speeds and (b) GCD curves at different current densities. The AB electrode in 7 M LiTFSI-PC electrolyte at -20 °C. (c) CV curves at different sweep speeds and (d) GCD curves at different current densities.

Table S2 Voltage window corresponding to different electrolytes.

| Electrode                                                                                                                    | Electrolyte                                                | Voltage window | Reference |
|------------------------------------------------------------------------------------------------------------------------------|------------------------------------------------------------|----------------|-----------|
| AB                                                                                                                           | 7 M LiTFSI-PC/H <sub>2</sub> O                             | 2.8 V          | This work |
| MnO <sub>2</sub> /rGO                                                                                                        | 1 M Na <sub>2</sub> SO <sub>4</sub>                        | 2.1 V          | 1         |
| LiR-NMC                                                                                                                      | 0.3 M LiTFSI in [EC/DMC +<br>PYR <sub>13</sub> TFSI + FEC] | 2.3 V          | 2         |
| NiO                                                                                                                          | [DHPMIM][OH] IL                                            | 1.1 V          | 3         |
| rGO                                                                                                                          | SCIL10                                                     | 1.9 V          | 4         |
| Graphite and rGO                                                                                                             | Et <sub>4</sub> NBF <sub>4</sub>                           | 1.2 V          | 5         |
| Pt                                                                                                                           | 32 M KCH <sub>3</sub> COO<br>+8 M LiCH <sub>3</sub> COO    | 2.7 V          | 6         |
| NaTi <sub>2</sub> (PO <sub>4</sub> ) <sub>3</sub> /Na <sub>0.66</sub> [Mn <sub>0.66</sub> Ti <sub>0.34</sub> ]O <sub>2</sub> | 9.26 M NaOTF-H <sub>2</sub> O                              | 2.14 V         | 7         |

**Reference:**

1. Q. Luo, H. Ma, Q. Hou, Y. Li, J. Ren, X. Dai, Z. Yao, Y. Zhou, L. Xiang, H. Du, H. He, N. Wang, K. Jiang, H. Lin, H. Zhang, Z. Guo, All-carbon-electrode-based durable flexible perovskite solar cells, *Adv. Funct. Mater.*, 2018, 28, 1706777.
2. J. Nair, F. Colò, A. Kazzazi, M. Moreno, D. Bresser, R. Lin, F. Bella, G. Meligrana, S. Fantini, E. Simonetti, G. Appetecchi, S. Passerini, C. Gerbaldi, Room temperature ionic liquid (RTIL)-based electrolyte cocktails for safe, high working potential Li-based polymer batteries, *J. Power Sources*, 2019, 412, 398.



3. S. Bhise, D. Awale, M. Vadiyar, S. Patil, U. Ghorpade, B. Kokare, J. Kim, S. Kolekar, A mesoporous nickel oxide nanosheet as an electrode material for supercapacitor application using the 1-(2',3'-dihydroxypropyl)-3- methylimidazolium hydroxide ionic liquid electrolyte, *Bull. Mater. Sci.*, 2019, 42, 263.
4. J. Martinez-Ligas, A. Oliva, M. Velazquez-Manzanares, C Garcia, A Mtz-Enriquez d, J. Oliva, Enhancing the capacitance/discharge times of flexible graphene supercapacitors with ionic liquid/Li electrolytes, *Mater. Lett.*, 2019, 253, 205.
5. E. Gomibuchi, T. Ichikawa, K. Kimura, S. Isobe, K. Nabeta, H. Fujii, Electrode properties of a double layer capacitor of nano-structured graphite produced by ball milling under a hydrogen atmosphere, *Carbon*, 2006, 44, 983.
6. M. Lukatskaya, J. Feldblyum, D. Mackanic, F. Lissel, D. Michels, Y. Cui, Z. Bao, Concentrated mixed cation acetate "water-in-salt" solutions as green and low-cost high voltage electrolytes for aqueous batteries, *Energy Environ. Sci.*, 2018, 11, 2876.
7. L. Suo, O. Borodin, Y. Wang, X. Rong, W. Sun, X. Fan, S. Xu, M. Schroeder, A. Cresce, F. Wang, C. Yang, Y. Hu, K. Xu, C. Wang, "Water-in-Salt" Electrolyte Makes Aqueous Sodium-Ion Battery Safe, Green, and Long-Lasting, *Adv. Energy Mater.*, 2017, 7, 1701189.
